# Supplementary material for: Hypertonic saline for severe symptomatic hyponatraemia: real-world findings from the UK
Source: PubMed Central journal article supplement — Endocr Connect. 2022 Apr 22;11(5):e220007. doi: 10.1530/EC-22-0007 (PMC9175607; doi:10.1530/ec-22-0007), 2022-04-22
Supplement: supplementary_table_1.pdf [file supplementary_table_1.pdf]

**Supplementary table 1: Characteristics of patients who received overcorrection treatment**

| <i>Patient number</i> | <i>Number of HTS boluses</i> | <i>Baseline Sodium (mmol/L)</i> | <i>Volume and concentration of dextrose infused as re-lowering treatment in the first 24 hours</i> | <i>Dose of desmopressin given in the first 24 hours</i> | <i>Sodium at 24 hours (mmol/L)</i> | <i>Rise in Sodium from baseline (mmol/L)</i> |
|-----------------------|------------------------------|---------------------------------|----------------------------------------------------------------------------------------------------|---------------------------------------------------------|------------------------------------|----------------------------------------------|
| 1                     | 2                            | 121                             | 5% Dextrose - 500 mL                                                                               | -                                                       | 127                                | 6                                            |
| 2                     | 3                            | 100                             | 5% Dextrose - 1375 mL<br>10% Dextrose - 200 mL<br>Dextrose-saline<br>4%/0.18% - 311 mL             | -                                                       | 118                                | 18*                                          |
| 3                     | 2                            | 102                             | 5% Dextrose - 250 mL<br>Dextrose-saline<br>4%/0.18% - 500 mL                                       | -                                                       | 115                                | 13*                                          |
| 4                     | 2                            | 106                             | 5% Dextrose - 1500 mL                                                                              | -                                                       | 121                                | 15*                                          |
| 5                     | 2                            | 105                             | 5% Dextrose - 2000 mL                                                                              | Not available                                           | 126                                | 21*                                          |
| 6                     | 1                            | 121                             | 5% Dextrose - 2150 mL                                                                              | -                                                       | 135                                | 14*                                          |
| 7                     | 1                            | 105                             | 5% Dextrose -500 mL                                                                                | -                                                       | 117                                | 12*                                          |
| 8                     | 1                            | 120                             | 5% Dextrose - 1000 mL                                                                              | -                                                       | 133                                | 13*                                          |
| 9                     | 1                            | 117                             | 10% Dextrose - 2000 mL                                                                             | -                                                       | 134                                | 17*                                          |
| 10                    | 1                            | 111                             | 5% Dextrose - 250 mL                                                                               | -                                                       | 128                                | 17*                                          |
| 11                    | 1                            | 108                             | 10% Dextrose - 800 mL                                                                              | -                                                       | 118                                | 10                                           |
| 12                    | 1                            | 107                             | 10% Dextrose 583 mL<br>20% Dextrose - 44 mL                                                        | -                                                       | 115                                | 8                                            |
| 13                    | 1                            | 109                             | 5% Dextrose - 364 mL                                                                               | -                                                       | 126                                | 17*                                          |
| 14                    | 1                            | 105                             | 10% Dextrose - 1000 mL                                                                             | -                                                       | 118                                | 13*                                          |
| 15                    | 1                            | 110                             | 5% Dextrose - 1300 mL<br>10% Dextrose - 1700 mL                                                    | 0.5 mg                                                  | 127                                | 17*                                          |
| 16                    | 2                            | 119                             | 10% Dextrose - 1000 mL                                                                             | -                                                       | 140                                | 21*                                          |
| 17                    | 2                            | 122                             | 5% Dextrose - 2250 mL<br>10% Dextrose - 600 mL                                                     | -                                                       | 132                                | 10                                           |
| 18                    | 2                            | 115                             | 5% Dextrose -1000 mL<br>10% Dextrose - 350 mL                                                      | -                                                       | 123                                | 8                                            |
| 19                    | 2                            | 105                             | 5% Dextrose - 500 mL                                                                               | 1 mg                                                    | 126                                | 21*                                          |
| 20                    | 3                            | 111                             | 5% Dextrose - 1600 mL                                                                              | -                                                       | 124                                | 13*                                          |
| 21                    | 3                            | 103                             | -                                                                                                  | 0.5 mg                                                  | 116                                | 13                                           |
| 22                    | 2                            | 111                             | -                                                                                                  | 0.5 mg                                                  | 117                                | 16                                           |

HTS=Hypertonic Saline; mL= millilitres; \* indicates overcorrection at 24 hours
